# Supplementary material
Source: PubMed Central journal article supplement (PMC3567735)
Supplement: 3bed4d6fd93ab0e047c2add77c0405d1_genetics.112.146241-3.pdf [file 3bed4d6fd93ab0e047c2add77c0405d1_genetics.112.146241-3.pdf]

**Table S3 Cytological count data.** Virgin *FM7, y w B / y w; ald<sup>Excision</sup> / Df(3R)AN6; pol* females were aged for 4 days post eclosion with yeast and no males, and Immuno-FISH labeled oocytes were scored for metaphase arrested chromosome coorientation. “Heterologous” segregation is when both *X* homologs segregate away from both *4s*, while “Non-Heterologous” segregation is when all *X* and *4* homologs go to the same pole. Note that the order of columns here corresponds to the order of columns in Table S2, which are further divided depending on which pole becomes the egg pronucleus and the sperm genotype.

| Line | Normal Coorientation  | 4-only Malorientation | X-only Malorientation | X-4 Heterologous      | X-4 Non-Heterologous |
|------|-----------------------|-----------------------|-----------------------|-----------------------|----------------------|
|      | <i>X4</i> ↔ <i>X4</i> | <i>X44</i> ↔ <i>X</i> | <i>XX4</i> ↔ <i>4</i> | <i>XX</i> ↔ <i>44</i> | <i>XX44</i> ↔ ∅      |
| 1    | 160                   | 13                    | 19                    | 9                     | 3                    |
| 4    | 178                   | 8                     | 21                    | 10                    | 1                    |
| 14   | 192                   | 10                    | 17                    | 10                    | 2                    |
| 15   | 175                   | 9                     | 13                    | 5                     | 2                    |
| 23   | 103                   | 35                    | 44                    | 19                    | 13                   |
| 25   | 201                   | 0                     | 0                     | 0                     | 0                    |
| 26   | 193                   | 12                    | 22                    | 15                    | 8                    |
| 30   | 178                   | 4                     | 16                    | 6                     | 2                    |
