# Supplementary material
Source: PubMed Central journal article supplement (PMC3567735)
Supplement: 7cfb8559bffaae8d2b869be5cf64766a_genetics.112.146241-6.pdf [file 7cfb8559bffaae8d2b869be5cf64766a_genetics.112.146241-6.pdf]

**Table S1 *ald* allele selection.** Each *yw; ald<sup>excision</sup> / TM3, Sb; pol* stock was crossed to *FM7, y w B / y<sup>+</sup>Y; ald<sup>1</sup> / TM3, Sb; pol* males. Trans-heterozygous *ald<sup>1</sup> / excision* female progeny were crossed to males from the tester stock and progeny scored for NDJ (see Methods). Previous sequencing characterized *ald<sup>excision-25</sup>* as a precise excision while *ald<sup>excision-23</sup>* retains a 130-nt fragment of *P* sequence in the 5' UTR (GILLILAND *et al.* 2007). Calculated NDJ rates are presented here, in ascending *X* rate order. The eight lines with asterisks were those selected for the main experiment to provide the greatest range of NDJ rates; the bottom three alleles were not used as they proved to be semilethal over *Df(3R)AN6*.

| Excision Line | <i>X</i> NDJ (%) | 4 NDJ (%) | N    |
|---------------|------------------|-----------|------|
| *25           | 2.3              | 2.6       | 344  |
| *30           | 6.2              | 7.7       | 1157 |
| 2             | 8.7              | 7.4       | 1172 |
| 38            | 9.3              | 5.7       | 1427 |
| *1            | 9.8              | 12.4      | 266  |
| 22            | 12.1             | 3.8       | 943  |
| 34            | 12.8             | 3.5       | 313  |
| *26           | 13.0             | 3.1       | 1058 |
| 5             | 13.3             | 5.0       | 813  |
| 31            | 13.9             | 3.7       | 374  |
| 18            | 14.8             | 4.2       | 1097 |
| *15           | 14.9             | 8.8       | 308  |
| 21            | 15.2             | 2.1       | 1292 |
| 17            | 15.5             | 3.6       | 982  |
| 20            | 15.9             | 12.5      | 893  |
| *14           | 18.6             | 15.0      | 506  |
| *4            | 25.9             | 32.9      | 85   |
| 35            | 26.4             | 12.2      | 492  |
| 36            | 28.6             | 16.2      | 748  |
| 13            | 28.9             | 15.1      | 166  |
| *23           | 29.7             | 9.0       | 619  |
| 11            | 32.6             | 14.3      | 926  |
| 29            | 37.2             | 22.0      | 468  |
| 6             | 41.0             | 22.5      | 356  |
