# Supplementary material
Source: PubMed Central journal article supplement (PMC3567735)
Supplement: 95b505eca5529773307ede498a6f6ac4_genetics.112.146241-4.pdf [file 95b505eca5529773307ede498a6f6ac4_genetics.112.146241-4.pdf]

**Table S2 Nondisjunction count data.** For each excision line, single *FM7, y w B / y w; ald<sup>Excision</sup> / Df(3R)AN6; pol* hemizygotes were crossed to *attached-XY, v f B / ∅; C(4)RM, ci ey<sup>R</sup>* males in vials, and progeny up through day 18 were scored. *Progeny* indicates the phenotype of each progeny class, while *Sperm* and *Oocyte* indicates the inferred chromosome content of the gametes. The three *y w ♂* columns include both *FM7, y w B / ∅* and *y w / ∅* males, which were not scored separately.

| <b>Progeny</b>  | <i>y w ♂</i>  | <i>B ♀</i> | <i>y w; ci ey<sup>R</sup> ♂</i> | <i>B; ci ey<sup>R</sup> ♀</i> | <i>y w; pol ♂</i> | <i>B; pol ♀</i> | <i>v f B ♂</i>    | <i>y w ♀</i> | <i>v f B; pol ♂</i>         | <i>y w; ci ey<sup>R</sup> ♀</i> | <i>v f B; ci ey<sup>R</sup> ♂</i> | <i>y w; pol ♀</i> |
|-----------------|---------------|------------|---------------------------------|-------------------------------|-------------------|-----------------|-------------------|--------------|-----------------------------|---------------------------------|-----------------------------------|-------------------|
| <b>Sperm</b>    | ∅ 44          | XY 44      | ∅ 44                            | XY 44                         | ∅ ∅               | XY ∅            | XY 44             | ∅ 44         | XY ∅                        | ∅ 44                            | XY 44                             | ∅ ∅               |
| <b>Oocyte</b>   | X 4           | X 4        | X ∅                             | X ∅                           | X 44              | X 44            | ∅ 4               | XX 4         | ∅ 44                        | XX ∅                            | ∅ ∅                               | XX 44             |
| <b>Excision</b> | <b>Normal</b> |            | <b>4-only NDJ</b>               |                               |                   |                 | <b>X-only NDJ</b> |              | <b>X &amp; 4 Double NDJ</b> |                                 |                                   |                   |
| 1               | 1093          | 1149       | 14                              | 41                            | 36                | 63              | 71                | 42           | 23                          | 10                              | 1                                 | 0                 |
| 4               | 1697          | 1929       | 36                              | 60                            | 61                | 115             | 90                | 92           | 28                          | 27                              | 1                                 | 1                 |
| 14              | 879           | 1026       | 29                              | 44                            | 40                | 49              | 47                | 38           | 18                          | 17                              | 5                                 | 1                 |
| 15              | 2019          | 2196       | 37                              | 52                            | 51                | 90              | 75                | 83           | 19                          | 18                              | 1                                 | 3                 |
| 23              | 601           | 691        | 85                              | 98                            | 98                | 174             | 200               | 189          | 72                          | 71                              | 25                                | 20                |
| 25              | 1041          | 1412       | 1                               | 1                             | 2                 | 0               | 2                 | 2            | 3                           | 2                               | 0                                 | 0                 |
| 26              | 887           | 941        | 19                              | 43                            | 40                | 61              | 63                | 57           | 24                          | 12                              | 1                                 | 2                 |
| 30              | 940           | 1120       | 19                              | 30                            | 46                | 58              | 62                | 40           | 12                          | 12                              | 0                                 | 2                 |
