# Supplementary material
Source: PubMed Central journal article supplement (PMC3567735)
Supplement: 1716cef28cf31a9cb33304f3a5ca646e_genetics.112.146241-1.pdf [file 1716cef28cf31a9cb33304f3a5ca646e_genetics.112.146241-1.pdf]

**Table S1 *ald* allele selection.** Each *yw; ald<sup>excision</sup> / TM3, Sb; pol* stock was crossed to *FM7, y w B / y<sup>+</sup>Y; ald<sup>1</sup> / TM3, Sb; pol* males. Trans-heterozygous *ald<sup>1</sup> / excision* female progeny were crossed to males from the tester stock and progeny scored for NDJ (see Methods). Previous sequencing characterized *ald<sup>excision-25</sup>* as a precise excision while *ald<sup>excision-23</sup>* retains a 130-nt fragment of *P* sequence in the 5' UTR (GILLILAND *et al.* 2007). Calculated NDJ rates are presented here, in ascending *X* rate order. The eight lines with asterisks were those selected for the main experiment to provide the greatest range of NDJ rates; the bottom three alleles were not used as they proved to be semilethal over *Df(3R)AN6*.

| Excision Line | <i>X</i> NDJ (%) | 4 NDJ (%) | N    |
|---------------|------------------|-----------|------|
| *25           | 2.3              | 2.6       | 344  |
| *30           | 6.2              | 7.7       | 1157 |
| 2             | 8.7              | 7.4       | 1172 |
| 38            | 9.3              | 5.7       | 1427 |
| *1            | 9.8              | 12.4      | 266  |
| 22            | 12.1             | 3.8       | 943  |
| 34            | 12.8             | 3.5       | 313  |
| *26           | 13.0             | 3.1       | 1058 |
| 5             | 13.3             | 5.0       | 813  |
| 31            | 13.9             | 3.7       | 374  |
| 18            | 14.8             | 4.2       | 1097 |
| *15           | 14.9             | 8.8       | 308  |
| 21            | 15.2             | 2.1       | 1292 |
| 17            | 15.5             | 3.6       | 982  |
| 20            | 15.9             | 12.5      | 893  |
| *14           | 18.6             | 15.0      | 506  |
| *4            | 25.9             | 32.9      | 85   |
| 35            | 26.4             | 12.2      | 492  |
| 36            | 28.6             | 16.2      | 748  |
| 13            | 28.9             | 15.1      | 166  |
| *23           | 29.7             | 9.0       | 619  |
| 11            | 32.6             | 14.3      | 926  |
| 29            | 37.2             | 22.0      | 468  |
| 6             | 41.0             | 22.5      | 356  |

**Table S2 Nondisjunction count data.** For each excision line, single *FM7, y w B / y w; ald<sup>Excision</sup> / Df(3R)AN6; pol* hemizygotes were crossed to *attached-XY, v f B / ∅; C(4)RM, ci ey<sup>R</sup>* males in vials, and progeny up through day 18 were scored. *Progeny* indicates the phenotype of each progeny class, while *Sperm* and *Oocyte* indicates the inferred chromosome content of the gametes. The three *y w ♂* columns include both *FM7, y w B / ∅* and *y w / ∅* males, which were not scored separately.

| Progeny  | <i>y w ♂</i> | <i>B ♀</i> | <i>y w; ci ey<sup>R</sup> ♂</i> | <i>B; ci ey<sup>R</sup> ♀</i> | <i>y w; pol ♂</i> | <i>B; pol ♀</i> | <i>v f B ♂</i> | <i>y w ♀</i> | <i>v f B; pol ♂</i> | <i>y w; ci ey<sup>R</sup> ♀</i> | <i>v f B; ci ey<sup>R</sup> ♂</i> | <i>y w; pol ♀</i> |
|----------|--------------|------------|---------------------------------|-------------------------------|-------------------|-----------------|----------------|--------------|---------------------|---------------------------------|-----------------------------------|-------------------|
| Sperm    | ∅ 44         | XY 44      | ∅ 44                            | XY 44                         | ∅ ∅               | XY ∅            | XY 44          | ∅ 44         | XY ∅                | ∅ 44                            | XY 44                             | ∅ ∅               |
| Oocyte   | X 4          | X 4        | X ∅                             | X ∅                           | X 44              | X 44            | ∅ 4            | XX 4         | ∅ 44                | XX ∅                            | ∅ ∅                               | XX 44             |
| Excision | Normal       |            | 4-only NDJ                      |                               |                   |                 | X-only NDJ     |              | X & 4 Double NDJ    |                                 |                                   |                   |
| 1        | 1093         | 1149       | 14                              | 41                            | 36                | 63              | 71             | 42           | 23                  | 10                              | 1                                 | 0                 |
| 4        | 1697         | 1929       | 36                              | 60                            | 61                | 115             | 90             | 92           | 28                  | 27                              | 1                                 | 1                 |
| 14       | 879          | 1026       | 29                              | 44                            | 40                | 49              | 47             | 38           | 18                  | 17                              | 5                                 | 1                 |
| 15       | 2019         | 2196       | 37                              | 52                            | 51                | 90              | 75             | 83           | 19                  | 18                              | 1                                 | 3                 |
| 23       | 601          | 691        | 85                              | 98                            | 98                | 174             | 200            | 189          | 72                  | 71                              | 25                                | 20                |
| 25       | 1041         | 1412       | 1                               | 1                             | 2                 | 0               | 2              | 2            | 3                   | 2                               | 0                                 | 0                 |
| 26       | 887          | 941        | 19                              | 43                            | 40                | 61              | 63             | 57           | 24                  | 12                              | 1                                 | 2                 |
| 30       | 940          | 1120       | 19                              | 30                            | 46                | 58              | 62             | 40           | 12                  | 12                              | 0                                 | 2                 |

**Table S3 Cytological count data.** Virgin *FM7, y w B / y w; ald<sup>Excision</sup> / Df(3R)AN6; pol* females were aged for 4 days post eclosion with yeast and no males, and Immuno-FISH labeled oocytes were scored for metaphase arrested chromosome coorientation. “Heterologous” segregation is when both *X* homologs segregate away from both *4s*, while “Non-Heterologous” segregation is when all *X* and *4* homologs go to the same pole. Note that the order of columns here corresponds to the order of columns in Table S2, which are further divided depending on which pole becomes the egg pronucleus and the sperm genotype.

| Line | Normal Coorientation  | 4-only Malorientation | X-only Malorientation | X-4 Heterologous      | X-4 Non-Heterologous |
|------|-----------------------|-----------------------|-----------------------|-----------------------|----------------------|
|      | <i>X4</i> ↔ <i>X4</i> | <i>X44</i> ↔ <i>X</i> | <i>XX4</i> ↔ <i>4</i> | <i>XX</i> ↔ <i>44</i> | <i>XX44</i> ↔ ∅      |
| 1    | 160                   | 13                    | 19                    | 9                     | 3                    |
| 4    | 178                   | 8                     | 21                    | 10                    | 1                    |
| 14   | 192                   | 10                    | 17                    | 10                    | 2                    |
| 15   | 175                   | 9                     | 13                    | 5                     | 2                    |
| 23   | 103                   | 35                    | 44                    | 19                    | 13                   |
| 25   | 201                   | 0                     | 0                     | 0                     | 0                    |
| 26   | 193                   | 12                    | 22                    | 15                    | 8                    |
| 30   | 178                   | 4                     | 16                    | 6                     | 2                    |

**Table S4 *nod* progeny count data.** Experimental females were crossed to tester males in vials, brooded once on day 5, and progeny scored as for *ald* alleles. Columns are the same as Table S2; however note that these flies carried isosequential X chromosomes which recombine normally, so NDJ was mainly restricted to chromosome 4. The *nod/+* heterozygous control exhibited 0.12% X and 0.29% 4 NDJ, close to expected wildtype background rates (ZHANG and HAWLEY 1990) indicating that the mutant allele is fully recessive. The *nod* homozygotes exhibited 2.2% X and 78.4% 4, with nullo progeny accounting for 50% of X and 95.1% of 4 NDJ.

| Progeny                    | <i>y w</i> ♂  | <i>B</i> ♀ | <i>y w; ci ey<sup>R</sup></i> ♂ | <i>B; ci ey<sup>R</sup></i> ♀ | <i>y w; pol</i> ♂ | <i>B; pol</i> ♀ | <i>vf B</i> ♂     | <i>y w</i> ♀ | <i>vf B; pol</i> ♂          | <i>y w; ci ey<sup>R</sup></i> ♀ | <i>vf B; ci ey<sup>R</sup></i> ♂ | <i>y w; pol</i> ♀ |
|----------------------------|---------------|------------|---------------------------------|-------------------------------|-------------------|-----------------|-------------------|--------------|-----------------------------|---------------------------------|----------------------------------|-------------------|
| <b>Sperm</b>               | ∅ 44          | XY 44      | ∅ 44                            | XY 44                         | ∅ ∅               | XY ∅            | XY 44             | ∅ 44         | XY ∅                        | ∅ 44                            | XY 44                            | ∅ ∅               |
| <b>Oocyte</b>              | X 4           | X 4        | X ∅                             | X ∅                           | X 44              | X 44            | ∅ 4               | XX 4         | ∅ 44                        | XX ∅                            | ∅ ∅                              | XX 44             |
|                            | <b>Normal</b> |            | <b>4-only NDJ</b>               |                               |                   |                 | <b>X-only NDJ</b> |              | <b>X &amp; 4 Double NDJ</b> |                                 |                                  |                   |
| <i>nod<sup>d</sup> / +</i> | 954           | 772        | 0                               | 2                             | 1                 | 0               | 0                 | 0            | 0                           | 1                               | 0                                | 0                 |
| <i>nod<sup>d</sup></i>     | 419           | 290        | 1279                            | 1218                          | 71                | 51              | 5                 | 8            | 3                           | 10                              | 11                               | 1                 |

**Table S5 *yw nod<sup>d</sup>* cytological data.** All 20 possible configurations are listed, with the number (N) of each observed, and the expected number of NDJ events each configuration would produce. For each oocyte, direction of the poles was determined by the paired 2L-3L probe signals, and the homologs associated with each pole were identified. The columns on the right are the proportion of normal, nullo or diplo progeny expected from that class, assuming the two poles are equally likely to become the pronucleus and that all chromosomes not touching the main autosomal mass will be lost. These proportions are multiplied by N for each row to predict the number of nullo and diplo X and 4 events (in parentheses). The numbers of events are then totaled, yielding a prediction of 3% X NDJ and 88% 4 NDJ. Nullo progeny accounted for 75% of X and 98% of 4 NDJ events. As a control, *yw / yw nod<sup>d</sup>* heterozygous females were also assayed, with 200/200 oocytes showing proper  $X4 \leftrightarrow X4$  coorientation.

| <i>Class</i>                          | <i>N</i>   | <i>Normal X</i> | <i>Nullo X</i> | <i>Diplo X</i> | <i>Normal 4</i> | <i>Nullo 4</i> | <i>Diplo 4</i> |
|---------------------------------------|------------|-----------------|----------------|----------------|-----------------|----------------|----------------|
| $\emptyset \leftrightarrow \emptyset$ | 2          | 0               | 1 (2)          | 0              | 0               | 1 (2)          | 0              |
| $\emptyset \leftrightarrow X$         | 0          | 0.5             | 0.5            | 0              | 0               | 1              | 0              |
| $\emptyset \leftrightarrow 4$         | 0          | 0               | 1              | 0              | 0.5             | 0.5            | 0              |
| $\emptyset \leftrightarrow XX$        | 3          | 0               | 0.5 (1.5)      | 0.5 (1.5)      | 0               | 1 (3)          | 0              |
| $X \leftrightarrow X$                 | 143        | 1 (143)         | 0              | 0              | 0               | 1 (143)        | 0              |
| $\emptyset \leftrightarrow 44$        | 0          | 0               | 1              | 0              | 0               | 0.5            | 0.5            |
| $4 \leftrightarrow 4$                 | 0          | 0               | 1              | 0              | 1               | 0              | 0              |
| $\emptyset \leftrightarrow X4$        | 2          | 0.5 (1)         | 0.5 (1)        | 0              | 0.5 (1)         | 0.5 (1)        | 0              |
| $4 \leftrightarrow X$                 | 0          | 0.5             | 0.5            | 0              | 0.5             | 0.5            | 0              |
| $\emptyset \leftrightarrow XX4$       | 0          | 0               | 0.5            | 0.5            | 0.5             | 0.5            | 0              |
| $4 \leftrightarrow XX$                | 0          | 0               | 0.5            | 0.5            | 0.5             | 0.5            | 0              |
| $X \leftrightarrow X4$                | 39         | 1 (39)          | 0              | 0              | 0.5 (19.5)      | 0.5 (19.5)     | 0              |
| $\emptyset \leftrightarrow X44$       | 0          | 0.5             | 0.5            | 0              | 0               | 0.5            | 0.5            |
| $X \leftrightarrow 44$                | 0          | 0.5             | 0.5            | 0              | 0               | 0.5            | 0.5            |
| $4 \leftrightarrow X4$                | 0          | 0.5             | 0.5            | 0              | 1               | 0              | 0              |
| $X \leftrightarrow X44$               | 7          | 1 (7)           | 0              | 0              | 0               | 0.5 (3.5)      | 0.5 (3.5)      |
| $4 \leftrightarrow XX4$               | 0          | 0               | 0.5            | 0.5            | 1               | 0              | 0              |
| $\emptyset \leftrightarrow XX44$      | 0          | 0               | 0.5            | 0.5            | 0               | 0.5            | 0.5            |
| $44 \leftrightarrow XX$               | 0          | 0               | 0.5            | 0.5            | 0               | 0.5            | 0.5            |
| $X4 \leftrightarrow X4$               | 4          | 1 (4)           | 0              | 0              | 1 (4)           | 0              | 0              |
| <b>Total</b>                          | <b>200</b> | <b>194</b>      | <b>4.5</b>     | <b>1.5</b>     | <b>24.5</b>     | <b>172</b>     | <b>3.5</b>     |
