# Supplementary material
Source: PubMed Central journal article supplement (PMC3567735)
Supplement: a1e6a7a3545b6e26d45631846b6b3619_genetics.112.146241-2.pdf [file a1e6a7a3545b6e26d45631846b6b3619_genetics.112.146241-2.pdf]

**Table S4 *nod* progeny count data.** Experimental females were crossed to tester males in vials, brooded once on day 5, and progeny scored as for *ald* alleles. Columns are the same as Table S2; however note that these flies carried isosequential X chromosomes which recombine normally, so NDJ was mainly restricted to chromosome 4. The *nod*/+ heterozygous control exhibited 0.12% X and 0.29% 4 NDJ, close to expected wildtype background rates (ZHANG and HAWLEY 1990) indicating that the mutant allele is fully recessive. The *nod* homozygotes exhibited 2.2% X and 78.4% 4, with nullo progeny accounting for 50% of X and 95.1% of 4 NDJ.

| Progeny                  | <i>y w</i> ♂  | <i>B</i> ♀ | <i>y w; ci ey<sup>R</sup></i> ♂ | <i>B; ci ey<sup>R</sup></i> ♀ | <i>y w; pol</i> ♂ | <i>B; pol</i> ♀ | <i>vf B</i> ♂     | <i>y w</i> ♀ | <i>vf B; pol</i> ♂          | <i>y w; ci ey<sup>R</sup></i> ♀ | <i>vf B; ci ey<sup>R</sup></i> ♂ | <i>y w; pol</i> ♀ |
|--------------------------|---------------|------------|---------------------------------|-------------------------------|-------------------|-----------------|-------------------|--------------|-----------------------------|---------------------------------|----------------------------------|-------------------|
| <b>Sperm</b>             | ∅ 44          | XY 44      | ∅ 44                            | XY 44                         | ∅ ∅               | XY ∅            | XY 44             | ∅ 44         | XY ∅                        | ∅ 44                            | XY 44                            | ∅ ∅               |
| <b>Oocyte</b>            | X 4           | X 4        | X ∅                             | X ∅                           | X 44              | X 44            | ∅ 4               | XX 4         | ∅ 44                        | XX ∅                            | ∅ ∅                              | XX 44             |
|                          | <b>Normal</b> |            | <b>4-only NDJ</b>               |                               |                   |                 | <b>X-only NDJ</b> |              | <b>X &amp; 4 Double NDJ</b> |                                 |                                  |                   |
| <i>nod<sup>d</sup>/+</i> | 954           | 772        | 0                               | 2                             | 1                 | 0               | 0                 | 0            | 0                           | 1                               | 0                                | 0                 |
| <i>nod<sup>d</sup></i>   | 419           | 290        | 1279                            | 1218                          | 71                | 51              | 5                 | 8            | 3                           | 10                              | 11                               | 1                 |
